# Supplementary material for: Smac mimetic LCL161 supports neuroblastoma chemotherapy in a drug class-dependent manner and synergistically interacts with ALK inhibitor TAE684 in cells with ALK mutation F1174L
Source: PubMed Central journal article supplement (PMC5341933; doi:10.18632/oncotarget.12055), 2016-09-15
Supplement: oncotarget-07-72634-s001.pdf [file oncotarget-07-72634-s001.pdf]

**Smac mimetic LCL161 supports neuroblastoma chemotherapy in a drug class-dependent manner and synergistically interacts with ALK inhibitor TAE684 in cells with ALK mutation F1174L**

**Supplementary Material**

**Table S1. ALK inhibition with TAE684 significantly increases inhibition of cell proliferation induced by combination of doxorubicin with LCL161 in neuroblastoma cell lines with ALK mutation F1174L.**

**Table S1A**

| LCL161 (10 $\mu$ M) | DOX<br>IC <sub>50</sub> ( $\mu$ M) |     |     |     | LCL161<br>IC <sub>50</sub> ( $\mu$ M) | TAE684<br>IC <sub>50</sub> ( $\mu$ M) |
|---------------------|------------------------------------|-----|-----|-----|---------------------------------------|---------------------------------------|
|                     | -                                  | +   | -   | +   |                                       |                                       |
| TAE684 (1 nM)       | -                                  | -   | +   | +   |                                       |                                       |
| Kelly               | .23                                | .19 | .24 | .13 | 49                                    | 5.37                                  |
| SH-EP TET21N        | .22                                | .19 | .19 | .07 | 73                                    | 0.12                                  |
| SK-N-SH             | .38                                | .28 | .38 | .16 | 56                                    | 1.12                                  |
| NB1691luc           | 1.09                               | .6  | .67 | .29 | 69                                    | 0.74                                  |
| SK-N-AS             | .97                                | .23 | .79 | .15 | 78                                    | 0.83                                  |
| SK-N-BE(2)-M17      | .3                                 | .18 | .23 | .16 | 59                                    | 3.73                                  |

**Table S1B**

|                | DOX + LCL161<br>CI(IC <sub>50</sub> ) | DOX + LCL161<br>+ TAE684<br>CI(IC <sub>50</sub> ) |
|----------------|---------------------------------------|---------------------------------------------------|
| Kelly          | 1.05                                  | 0.75                                              |
| SH-EP TET21N   | 0.98                                  | 0.50                                              |
| SK-N-SH        | 0.92                                  | 0.61                                              |
| NB1691luc      | 0.70                                  | 0.57                                              |
| SK-N-AS        | 0.36                                  | 0.32                                              |
| SK-N-BE(2)-M17 | 0.78                                  | 0.84                                              |

**Table S1. ALK inhibition with TAE684 significantly increases inhibition of cell proliferation induced by combination of doxorubicin with LCL161 in neuroblastoma cell lines with ALK mutation F1174L.** IC<sub>50</sub> values for dose-effect curves were determined (**A**). IC<sub>50</sub> were taken as a basis for the calculation of combination indices (CI) using the Chou-Talay method (**B**). Range of CI values and correlating intensity of synergism is illustrated by grey shading (□ = nearly additive (CI >0.9-1.1) or antagonistic (CI >1.1), ◻ = slight synergism (CI = 0.9-0.86), ◻ = moderate synergism (CI = 0.85-0.71), ◻ = synergism (CI = 0.7-0.31), ◻ = strong synergism (CI ≤0.3)). DOX, doxorubicin.

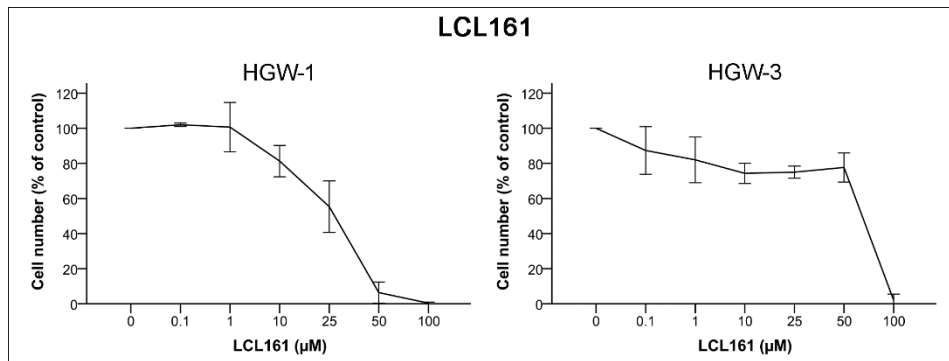

**Figure S1. Inhibition of cell proliferation in *de novo* neuroblastoma cell lines by LCL161.** Cells were treated with the indicated concentrations of LCL161 and proliferation was determined after 48h. Proliferation of untreated cells was defined as 100 %. Values represent the mean  $\pm$  SD of three independent experiments.

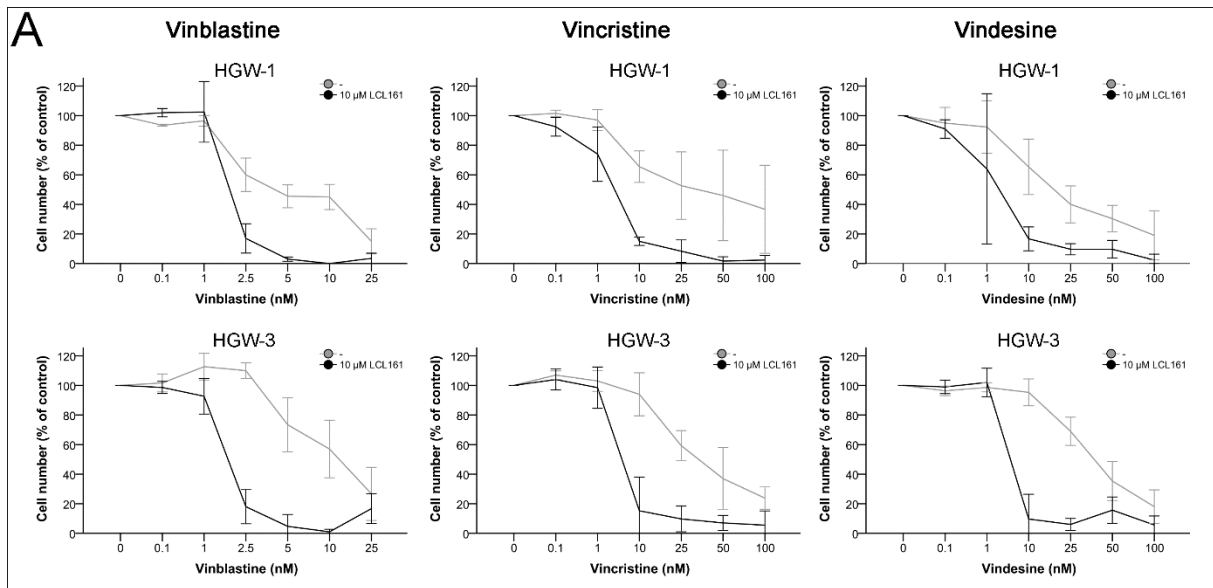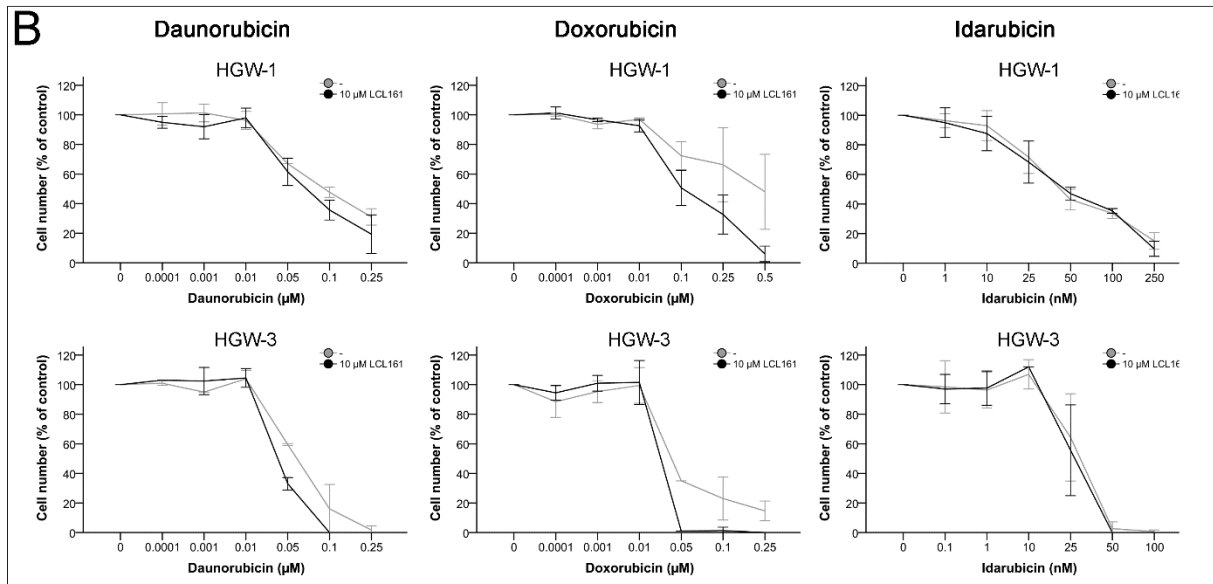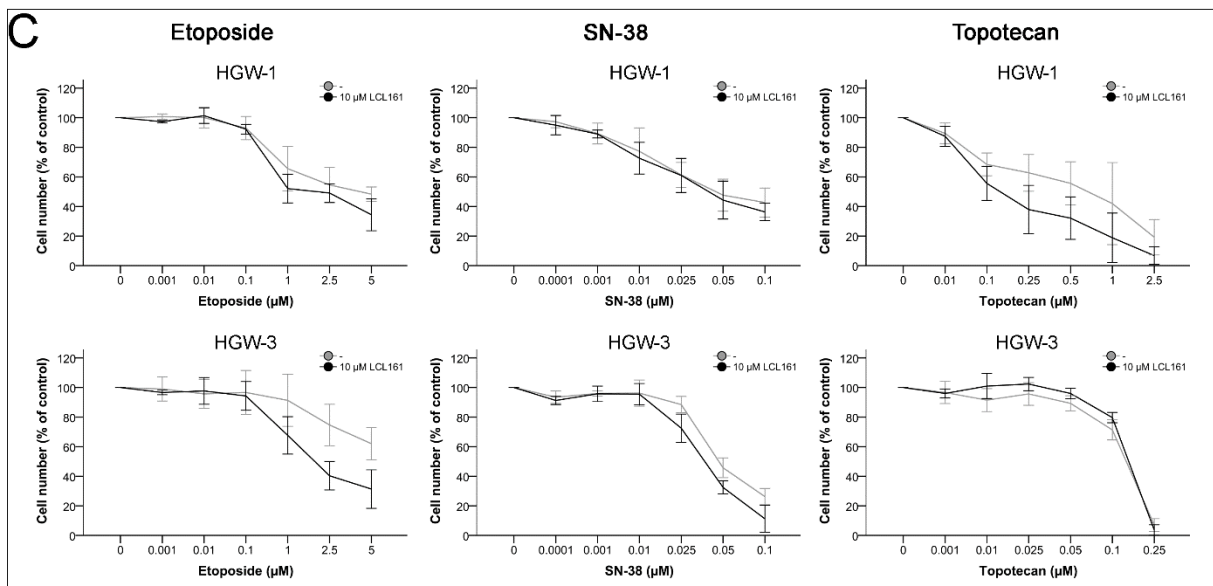

**Figure S2. Inhibition of cell proliferation in *de novo* neuroblastoma cell lines by vinca alkaloids, anthracyclines or topoisomerase inhibitors and their combination with LCL161.** Cells were treated with the indicated concentrations of vinblastine/vincristine/vindesine **A.**, daunorubicin/doxorubicin/idarubicin **B.**, etoposide/SN-38/topotecan **C.** or LCL161 (**A.-C.**) and proliferation was determined after 48 h. Proliferation of untreated cells was defined as 100 %. Values represent the mean  $\pm$  SD of three independent experiments.

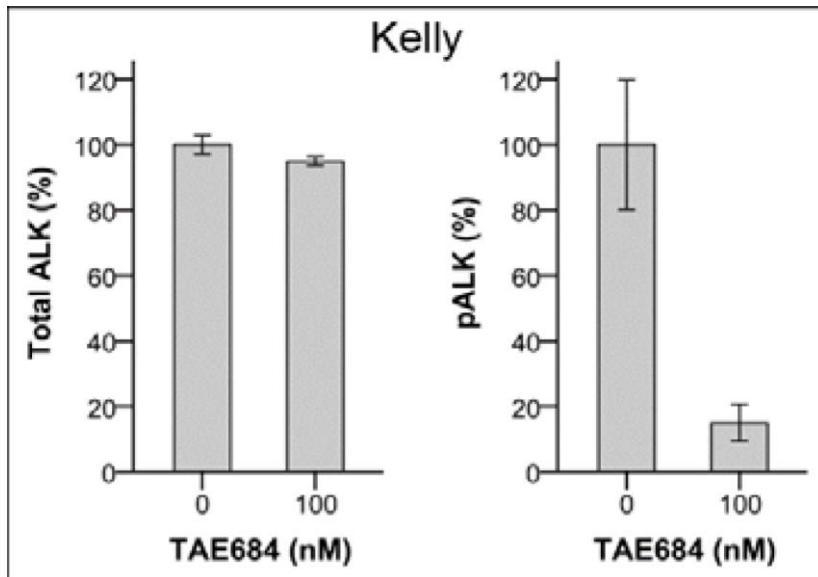

**Figure S3. Effect of ALK inhibitor TAE684 on protein levels of ALK and pALK in Kelly neuroblastoma cell line.** Expression of total ALK and pALK was detected by ELISA in Kelly cells treated for 6 h with 100 nM TAE684. Total protein content of lysates was used to normalize determined expression values. Values represent the mean  $\pm$  SD of duplicates.
